# Supplementary material
Source: PubMed Central journal article supplement (PMC3043665)
Supplement: supp_ddq561_ddq561supp_3.pdf [file supp_ddq561_ddq561supp_3.pdf]

| Probe             | CRBLM       |          | FCTX        |          | PONS        |          | TCTX        |          |
|-------------------|-------------|----------|-------------|----------|-------------|----------|-------------|----------|
|                   | T-statistic | P-value  | T-statistic | P-value  | T-statistic | P-value  | T-statistic | P-value  |
| <i>cg06144905</i> | 15.44814    | 6.71E-29 | 19.1032     | 1.09E-39 | 14.37545    | 3.51E-28 | 28.82641    | 2.56E-57 |
| <i>cg06993413</i> | 15.54651    | 4.20E-29 | 19.20717    | 6.47E-40 | 14.41989    | 2.76E-28 | 28.83492    | 2.48E-57 |
| <i>cg10523019</i> | 15.47171    | 6.00E-29 | 19.14374    | 8.91E-40 | 14.5209     | 1.60E-28 | 28.843      | 2.40E-57 |
| <i>cg14424579</i> | 15.59642    | 3.31E-29 | 19.06795    | 1.31E-39 | 14.44197    | 2.45E-28 | 28.83559    | 2.47E-57 |
| <i>cg15201877</i> | 15.53658    | 4.40E-29 | 19.19907    | 6.74E-40 | 14.6588     | 7.60E-29 | 29.04429    | 1.12E-57 |
| <i>cg18108623</i> | 15.48166    | 5.72E-29 | 19.15707    | 8.33E-40 | 14.57526    | 1.19E-28 | 28.92424    | 1.77E-57 |
| <i>cg18555440</i> | 15.42125    | 7.63E-29 | 19.12717    | 9.69E-40 | 14.38502    | 3.33E-28 | 28.84498    | 2.38E-57 |
| <i>cg19945840</i> | 15.49883    | 5.27E-29 | 19.04478    | 1.47E-39 | 14.4741     | 2.06E-28 | 28.83258    | 2.50E-57 |
| <i>cg21589115</i> | 15.50814    | 5.04E-29 | 19.19714    | 6.81E-40 | 14.63515    | 8.63E-29 | 28.85745    | 2.27E-57 |
| <i>cg27529628</i> | 15.64899    | 2.58E-29 | 19.40868    | 2.35E-40 | 14.74009    | 4.90E-29 | 28.93544    | 1.69E-57 |
