# Supplementary material
Source: PubMed Central journal article supplement (PMC3043665)

# Density function of regression coefficients

## Discovery phase, strict island definitions

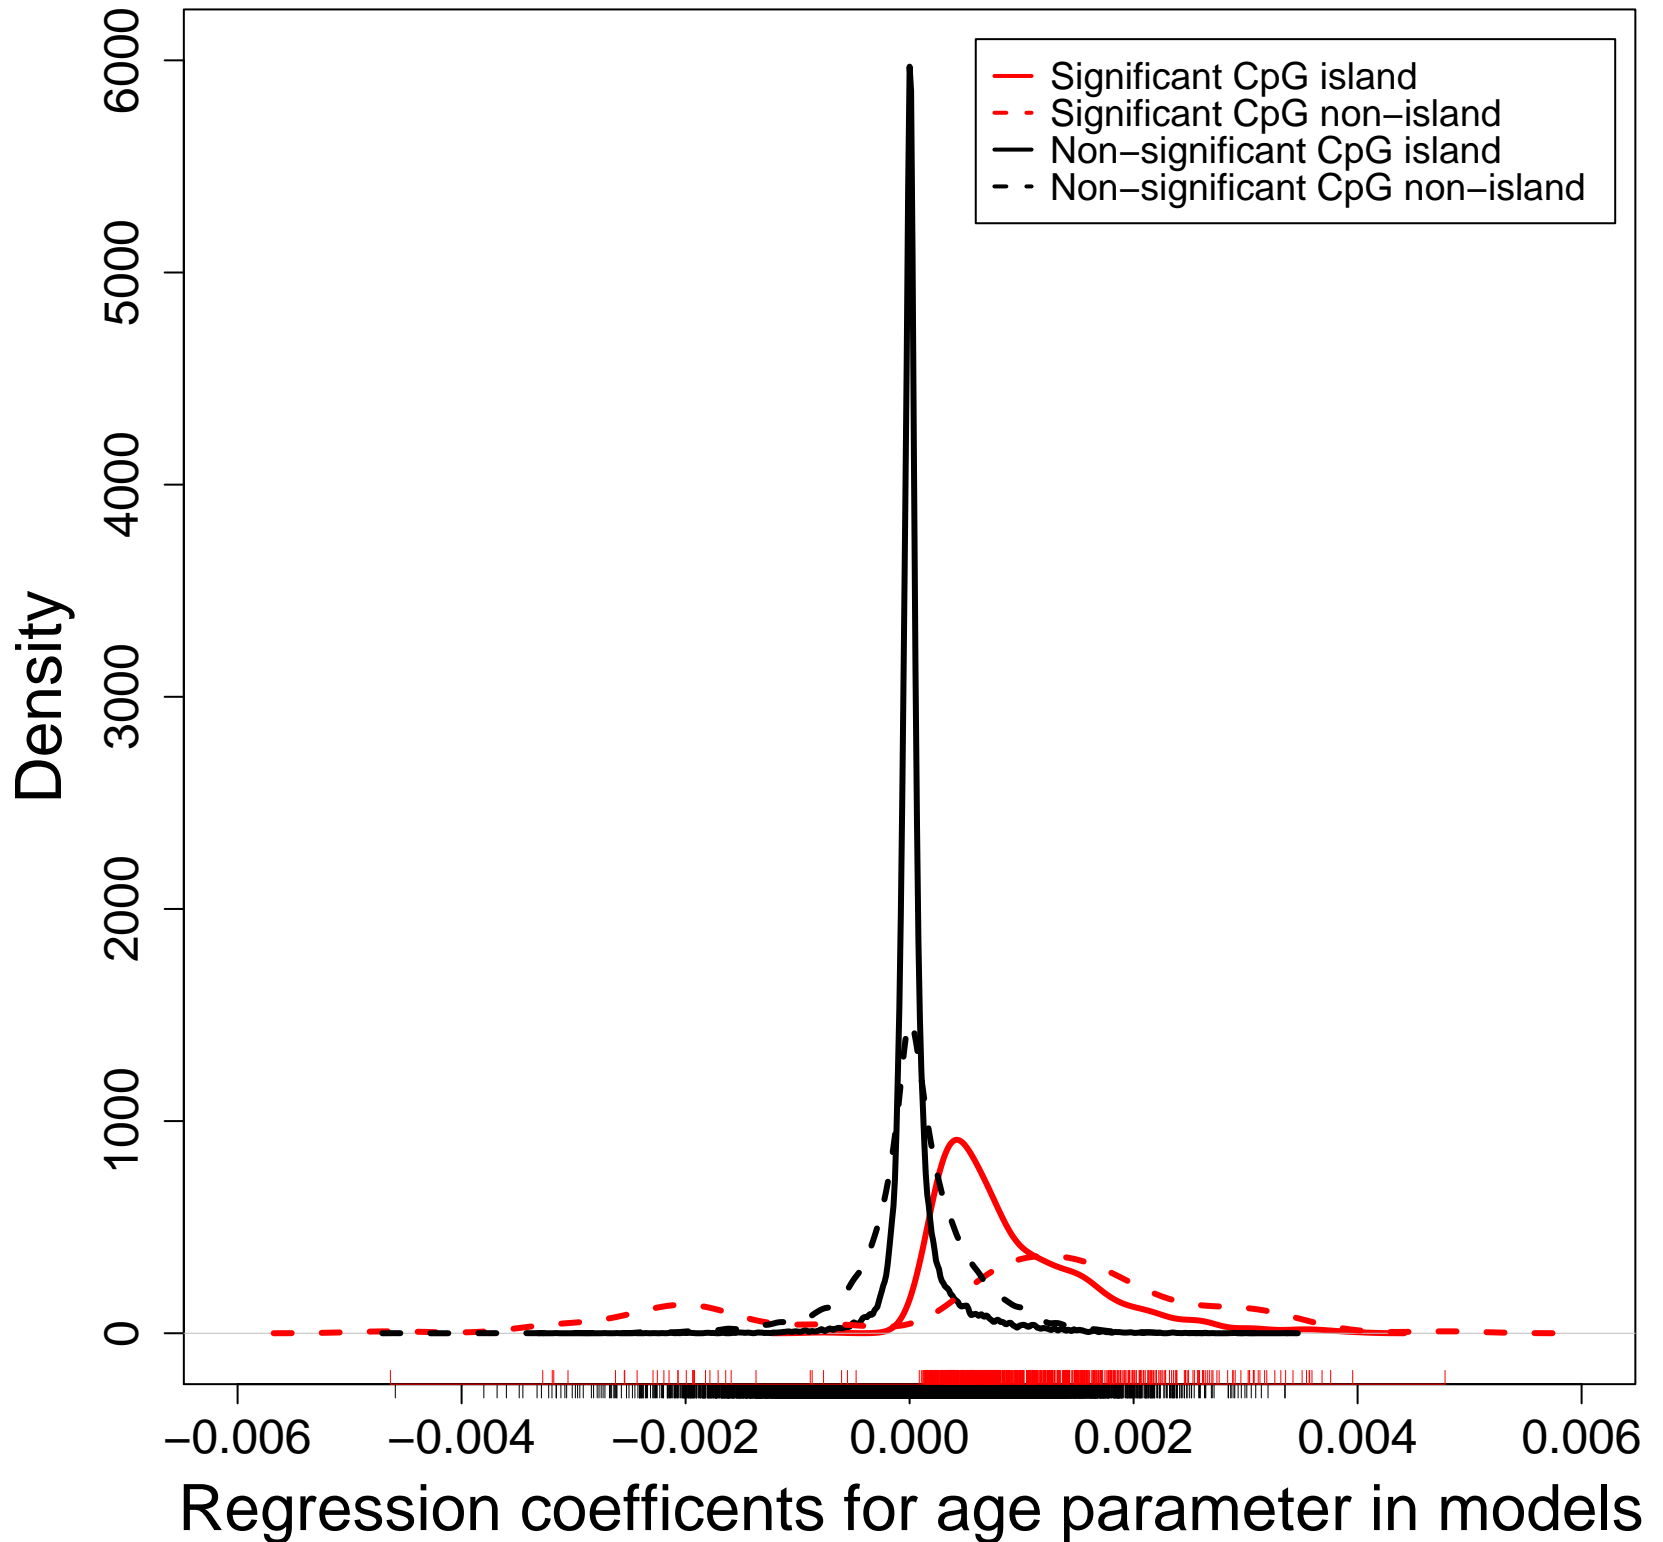

Supplement: supp_ddq561_ddq561supp_1.pdf [file supp_ddq561_ddq561supp_1.pdf]

### *CpG Island*

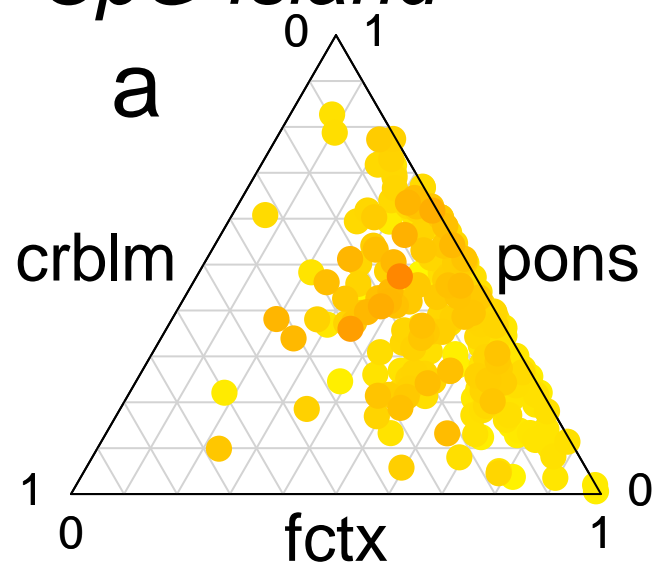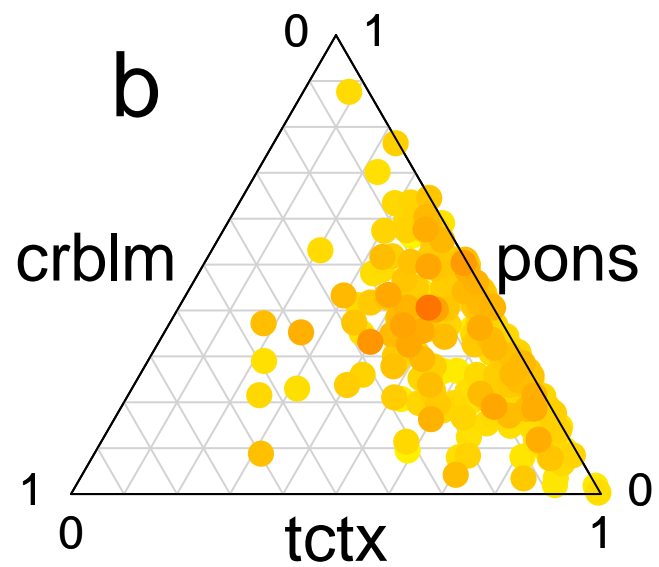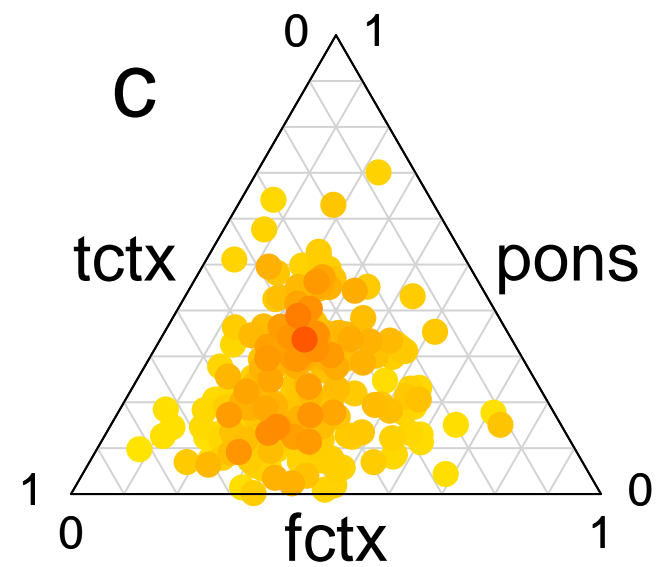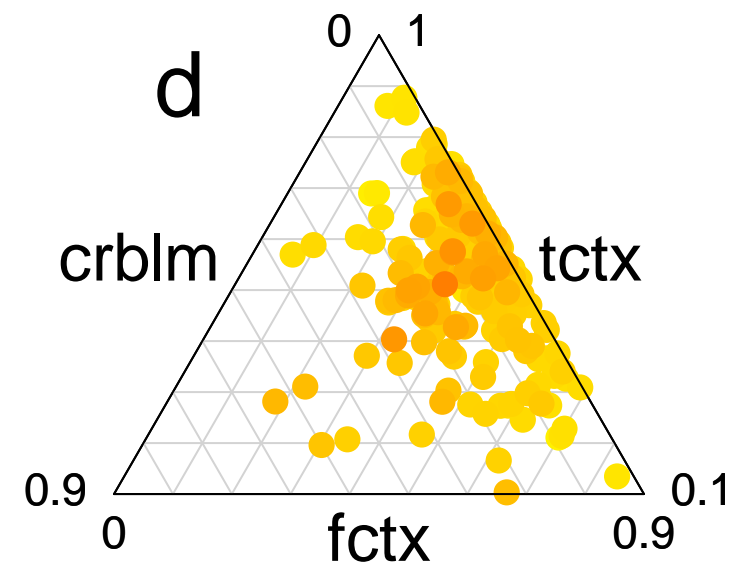

### *CpG non Island*

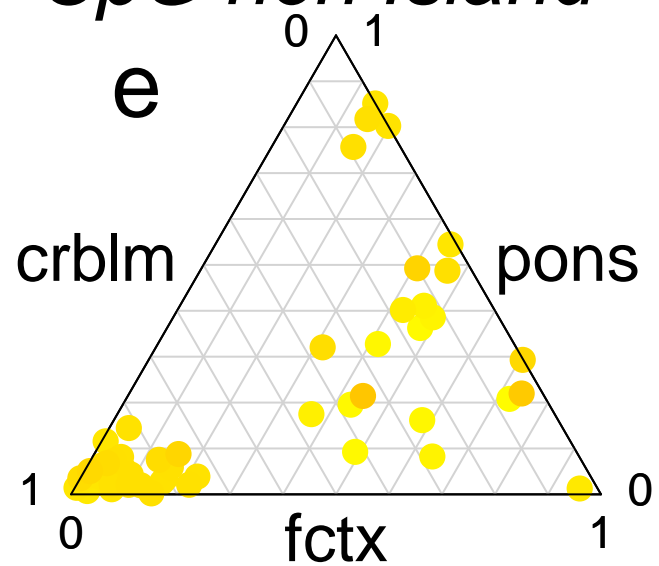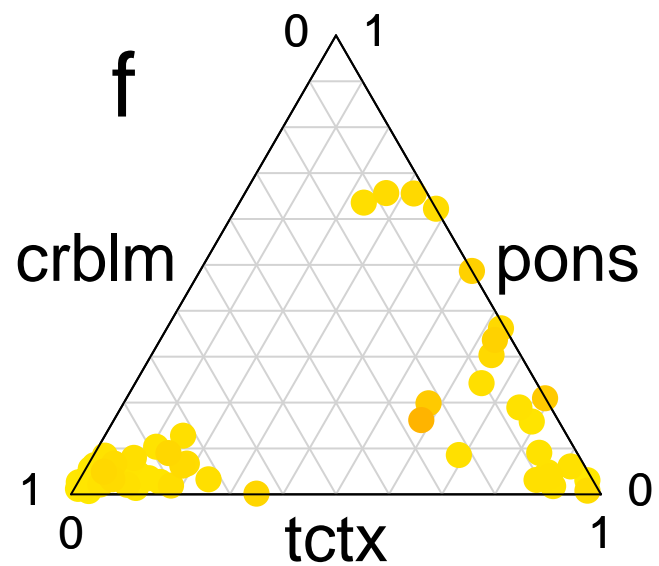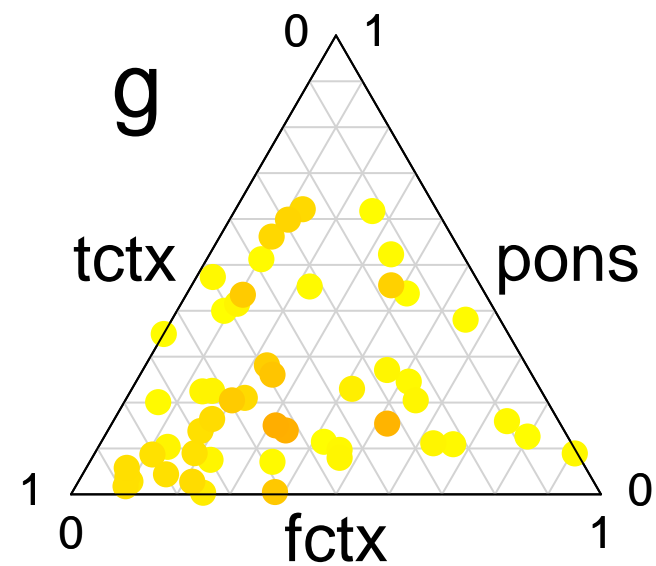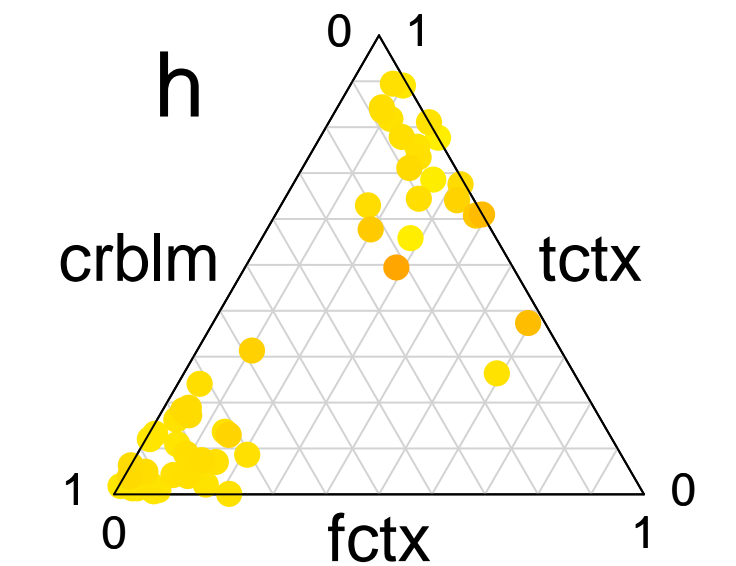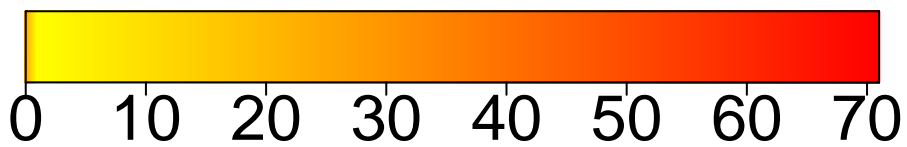

Cumulative log<sub>10</sub> p value

Supplement: supp_ddq561_ddq561supp_2.pdf [file supp_ddq561_ddq561supp_2.pdf]
